# Supplementary material
Source: PubMed Central journal article supplement (PMC4577403)

## Supplemental Data

**Supplemental Figure 1.** Elevated expression of *CIPK21* gene in the WT (Col-0) plants under various conditions such as ABA (100  $\mu$ M), cold (4°C), drought, or PEG (30%) treatments. Semi-quantitative RT-PCR analysis (25 cycles) was performed with *CIPK21*-specific primers. *ACTIN2* was used as a loading control.

**Supplemental Figure S2.** Expression of the *CIPK21* gene in *Arabidopsis eFP Browser*.

**Supplemental Figure S3.** Subcellular localization of the the *CIPK21* in the epidermal peel cells of *Nicotiana benthamiana*.

**Supplemental Figure S4.** *CIPK21*:GFP co-expressed either with *CBL1n*:OFP (upper panel, red) or *TPC1*:OFP (lower panel, red) in the epidermal cells of *Nicotiana benthamiana*. Scale bar = 40  $\mu$ m.

**Supplemental Figure S5.** Investigation of interaction of CBLs with *CIPK21* by bimolecular fluorescence complementation in the epidermal peel cells of *Nicotiana benthamiana*. Plasmid combinations are indicated on the left. Scale bars =40  $\mu$ m.

**Supplemental Figure S6.** Determination of the relative fluorescence produced to monitor the effects of salt stress treatment on pGPTV-II-BAR-35S::mVENUS vector, which were incubated with 125mM NaCl or control (10 mM MES pH5.6, 10 mM MgCl<sub>2</sub>) medium. Results are presented as average values along with standard errors from three experiments.

**Supplemental Table S1.** List of primers used for quantitative PCR/RT-PCR

| Name    | Sequence 5' → 3'             | quantitative PCR/RT-PCR |
|---------|------------------------------|-------------------------|
| CIPK21F | GAAATCCGCAGGCGAGTTAA         | quantitative PCR        |
| CIPK21R | GCTTACTTCCGCGGTAAGTAAGC      | quantitative PCR        |
| Actin2F | CTTGACCAAGCAGCATGAA          | quantitative PCR        |
| Actin2R | CCACCGATCCAGACACTGTACTT      | quantitative PCR        |
| CIPK21F | AAC TTTGAGATTACCCTTTGAATCTAG | RT-PCR                  |
| CIPK21R | ATGGGGTTTGTGGGAACGAAGAAGATC  | RT-PCR                  |

**Supplemental Table S2.** List of primers used for generation of constructs

| Name                  | Sequence 5' → 3'                       | Constructs                           |
|-----------------------|----------------------------------------|--------------------------------------|
| cipk21_speforw        | TTT <u>ACTAGTAT</u> GGGTTTGTGGGAACGAAG | GFP::CIPK21, CIPK21::GFP             |
|                       |                                        | CIPK21::SPYNE-173, SPYNE-173::CIPK21 |
| cipk21_xhorev         | TTTCTCGAGGCTTACTTCCGCGGTAAG            | GFP::CIPK21, CIPK21::GFP             |
|                       |                                        | CIPK21::SPYNE-173, SPYNE-173::CIPK21 |
| CBL2GFPfor            | TTTTCTAGAGGATCCTGAATGTCGCAGTGC GTTGA   | CBL02::mCHERRY                       |
| CBL2GFPprev           | TTTCCCGGGGGTATCTTCAACCTGAGAATGG        |                                      |
| CIPK21_promoterxbafor | AAATCTAGACAGGTTCTTTTGTCTCACAAAACG      | CIPK21 promoter::GUS                 |
| CIPK21_GUSbamrev      | AAAGGATCCCGTGATTGAATCGAAAGACTGGAAAG    |                                      |
| CIPK21_compecofor     | AAAGAATTCGGATTAAAGGTTTTGCTACACAAGGT    | CIPK21 promoter::CIPK21              |
| CIPK21_compbamrev     | AAAGGATCCCGTCGTTTGAAAATGTCCAATATAAACGA | CIPK21 promoter::CIPK21              |
| CIPK21_ADbamfor       | AAAGGATCCCATGGGTGTGTTGGAACGAAGAAGATCGG | AD::CIPK21                           |
| CIPK21_ADsalrev       | AAAGTCGACTTAGCTTACTTCCGCGGTAAGTAAGCTTG |                                      |

Restriction endonuclease sites are underlined

### Supplemental Table S3. Published constructs used in this work.

| Constructs                                                                                                                           | References                                                                                                                                                                                                                                                                                                                                                                                                                     |
|--------------------------------------------------------------------------------------------------------------------------------------|--------------------------------------------------------------------------------------------------------------------------------------------------------------------------------------------------------------------------------------------------------------------------------------------------------------------------------------------------------------------------------------------------------------------------------|
| pGPTV-II-BAR-pUBQ10-GFP::CIPK21<br>pGPTV-II-KAN-35S-CBL02::SPYCE-M<br>pGPTV-II-KAN-35S-CBL03::SPYCE-M<br>pGPTV-II-KAN-35S-CBL03::OFP | Batistič O, Waadt R, Steinhorst L, Held K, Kudla J. CBL-mediated targeting of CIPKs facilitates the decoding of calcium signals emanating from distinct cellular stores. <i>Plant J</i> ; 2010 <b>61</b> (2):211-222.                                                                                                                                                                                                          |
| BD.CBL1<br>BD.CBL2<br>BD.CBL3<br>BD.CBL4<br>BD.CBL5<br>BD.CBL6<br>BD.CBL7<br>BD.CBL8                                                 | Kim KN, Cheong YH, Gupta R, Luan S. Interaction specificity of Arabidopsis calcineurin B-like calcium sensors and their target kinases. <i>Plant physiology</i> 2000; <b>124</b> (4):1844-1853.<br>Albrecht V, Ritz O, Linder S, Harter K, Kudla J. The NAF domain defines a novel protein-protein interaction module conserved in Ca <sup>2+</sup> -regulated kinases. <i>The EMBO journal</i> 2001; <b>20</b> (5):1051-1063. |
| BD.CBL9                                                                                                                              | Kolukisaoglu Ü, Weigl S, Blazevic D, Batistič O, Kudla J. Calcium sensors and their interacting protein kinases: genomics of the Arabidopsis and rice CBL-CIPK signaling networks. <i>Plant Physiol</i> 2004; <b>134</b> : 43-58.                                                                                                                                                                                              |
| BD.CBL10                                                                                                                             | Kim BG, Waadt R, Cheong YH, <i>et al.</i> The calcium sensor CBL10 mediates salt tolerance by regulating ion homeostasis in Arabidopsis. <i>Plant J</i> 2007; <b>52</b> (3):473-484.                                                                                                                                                                                                                                           |

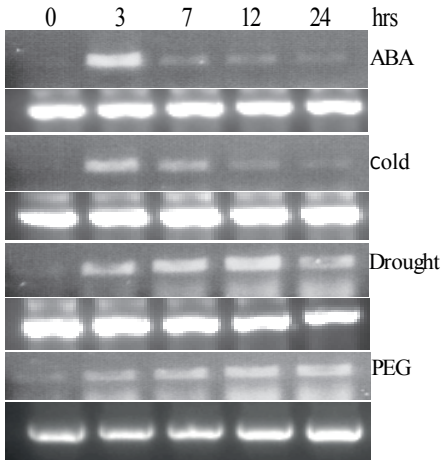

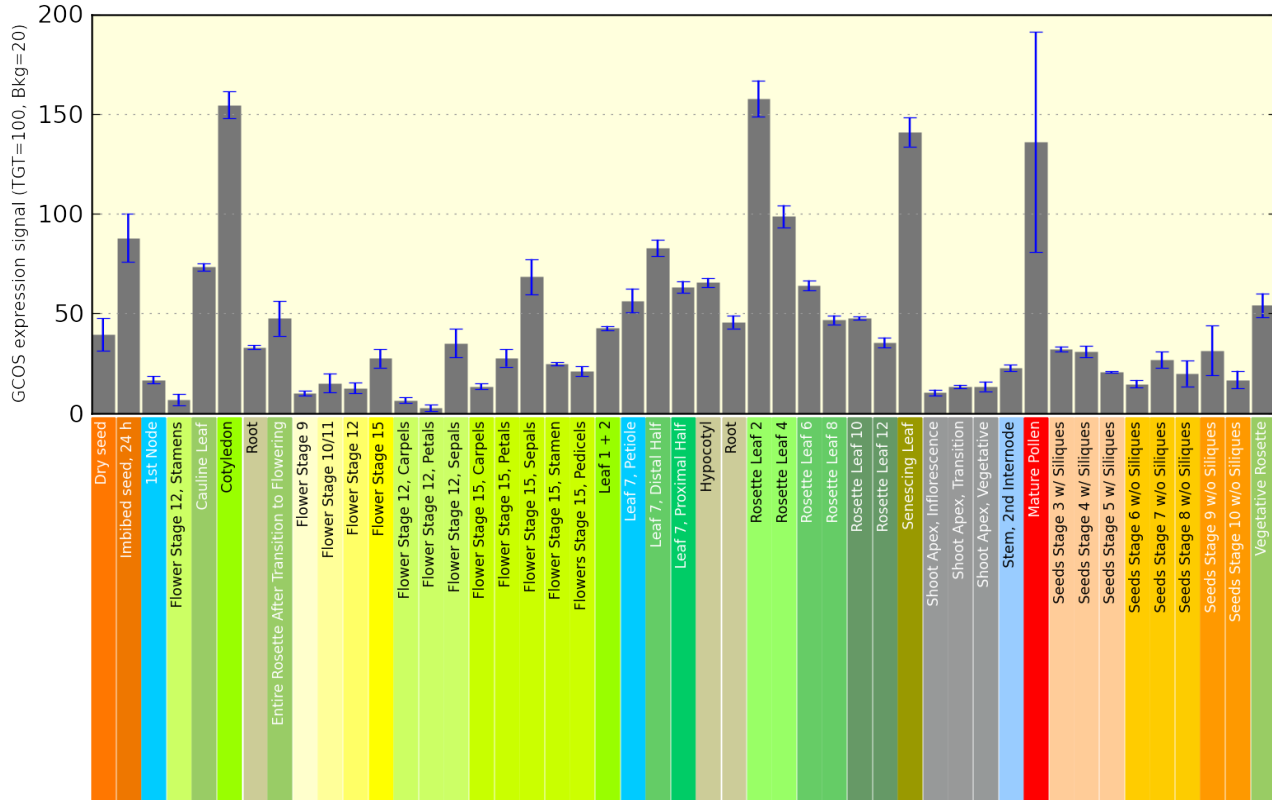

CIPK21::GFP

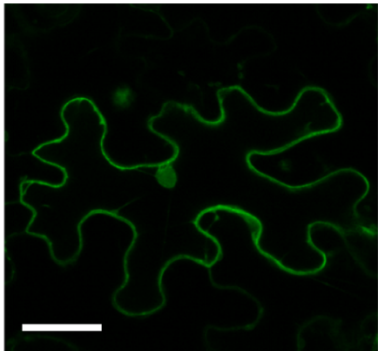

CIPK21::GFP

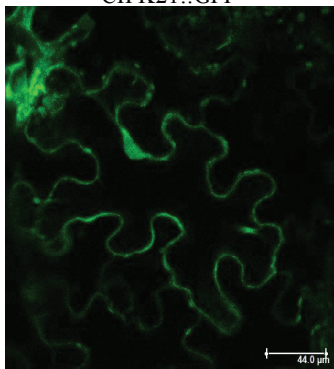

CBL1n::OFP

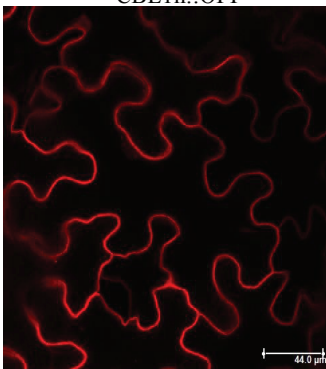

Overlay

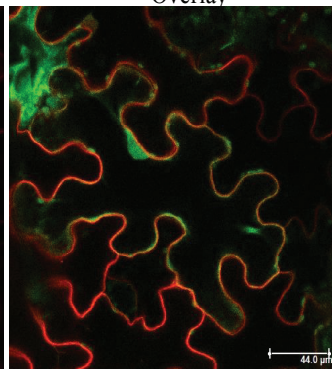

CIPK21::GFP

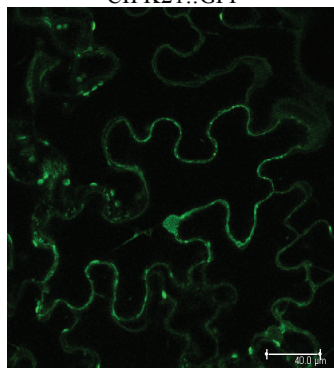

TPC1::OFP

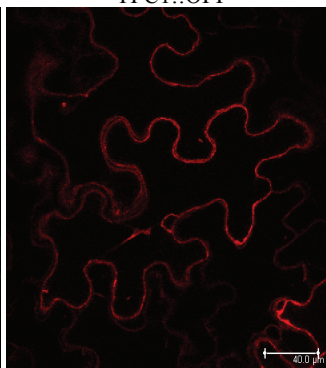

Overlay

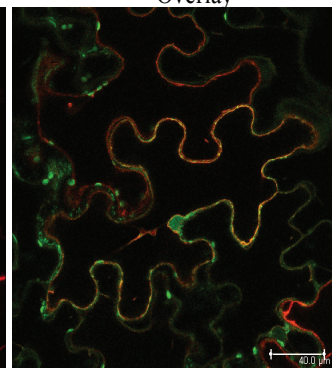

SPYNE(R)173::CIPK21  
+CBL5::SPYCE(M)

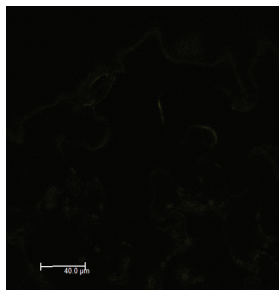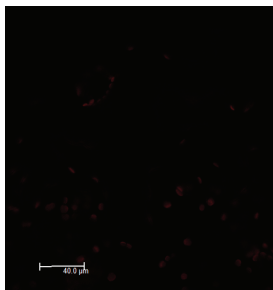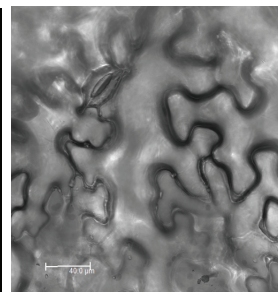

SPYNE(R)173::CIPK21  
+CBL7::SPYCE(M)

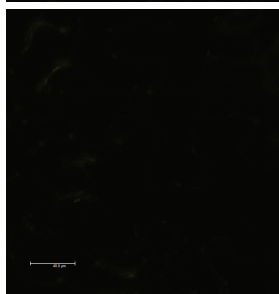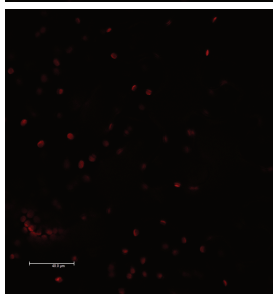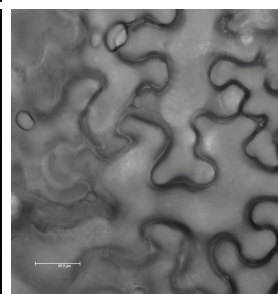

SPYNE(R)173::CIPK21  
+SPYCE(M)

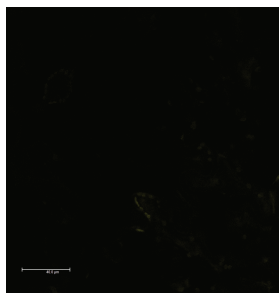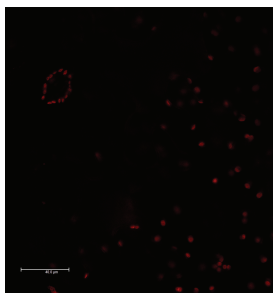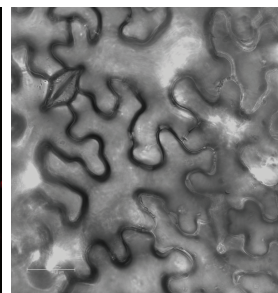

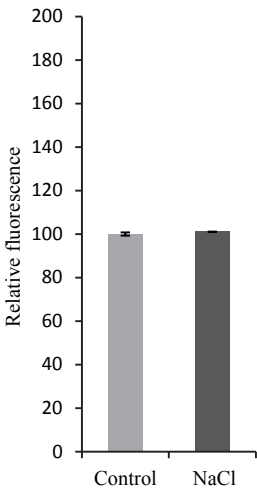

Supplement: supp_pp.15.00623_00623suppdata.pdf [file supp_pp.15.00623_00623suppdata.pdf]
